# Supplementary material
Source: PubMed Central journal article supplement (PMC6153796)

1 **Supplementary Figure 1. Experiment Flow of Murine Bacteremia Model**

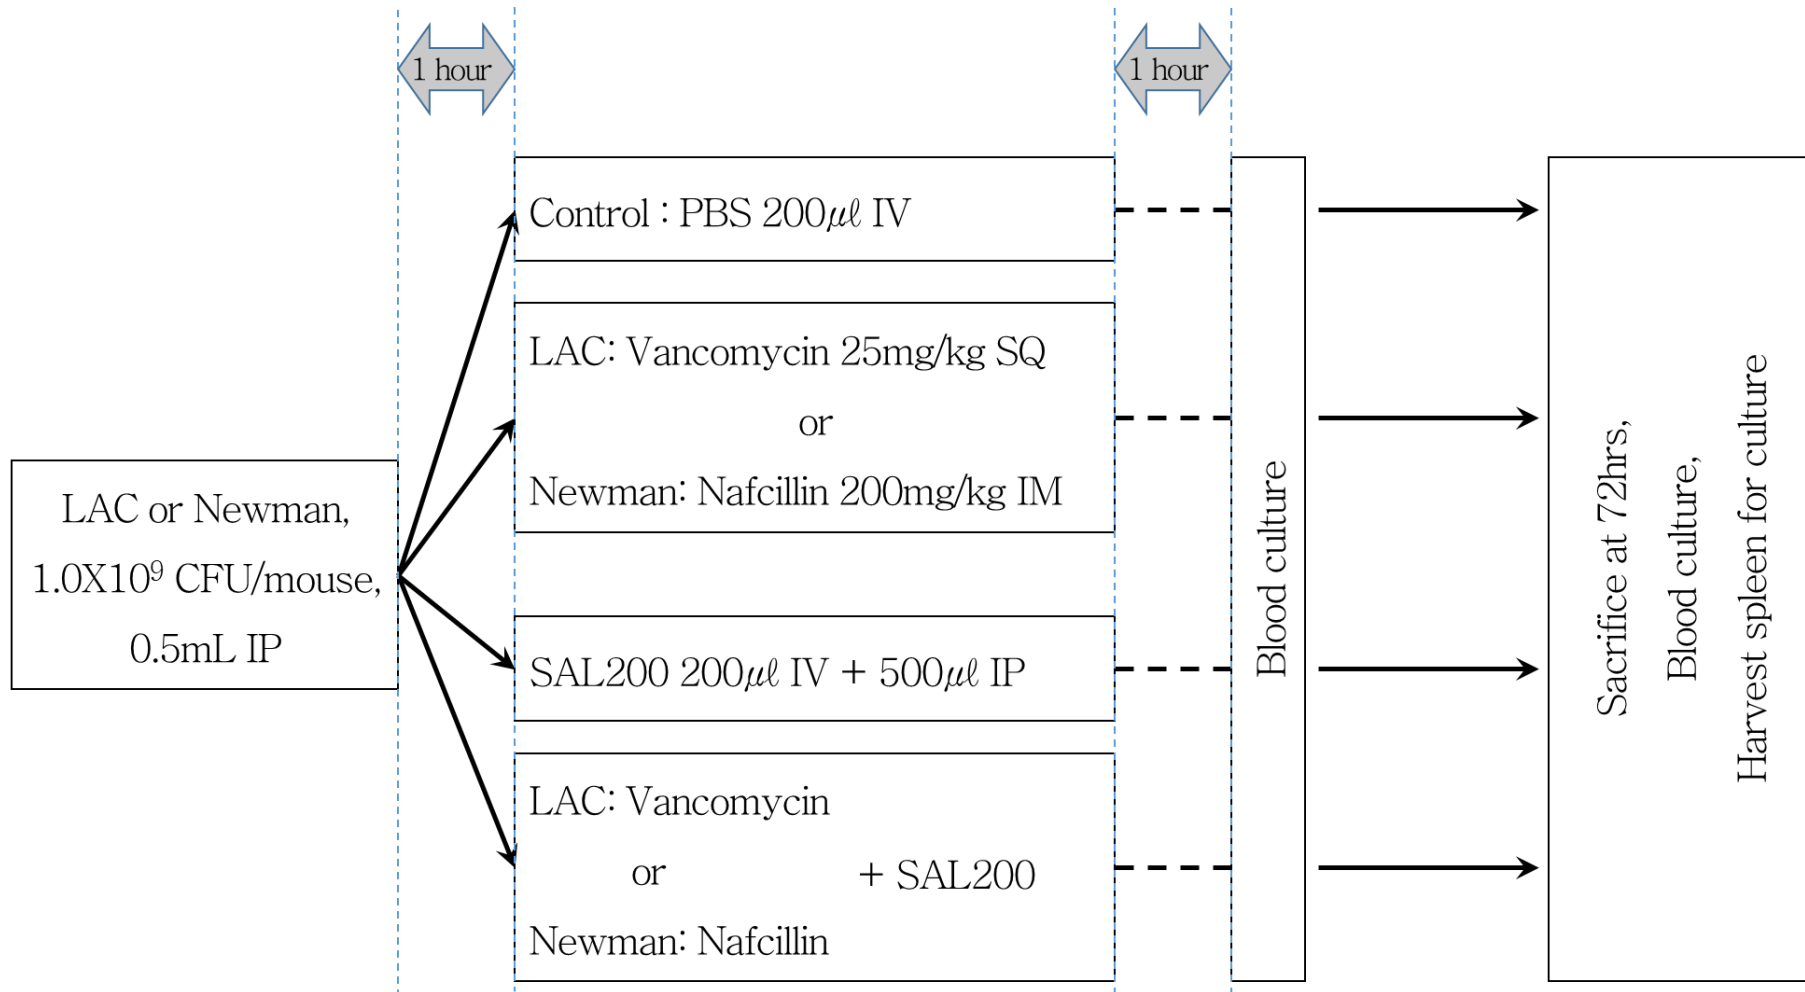

2

3

4 **Supplementary Figure 2. Time-Kill Curves for (a) MRSA ATCC 33591 and (b) MSSA**  
 5 **ATCC 29213, Treated with Buffer, MIC- and subMIC- Concentrations of either SAL200,**  
 6 **SOC Antibiotics, or Combinations of SAL200 and SOC Antibiotics.**

7 **(a) MRSA ATCC 33591**

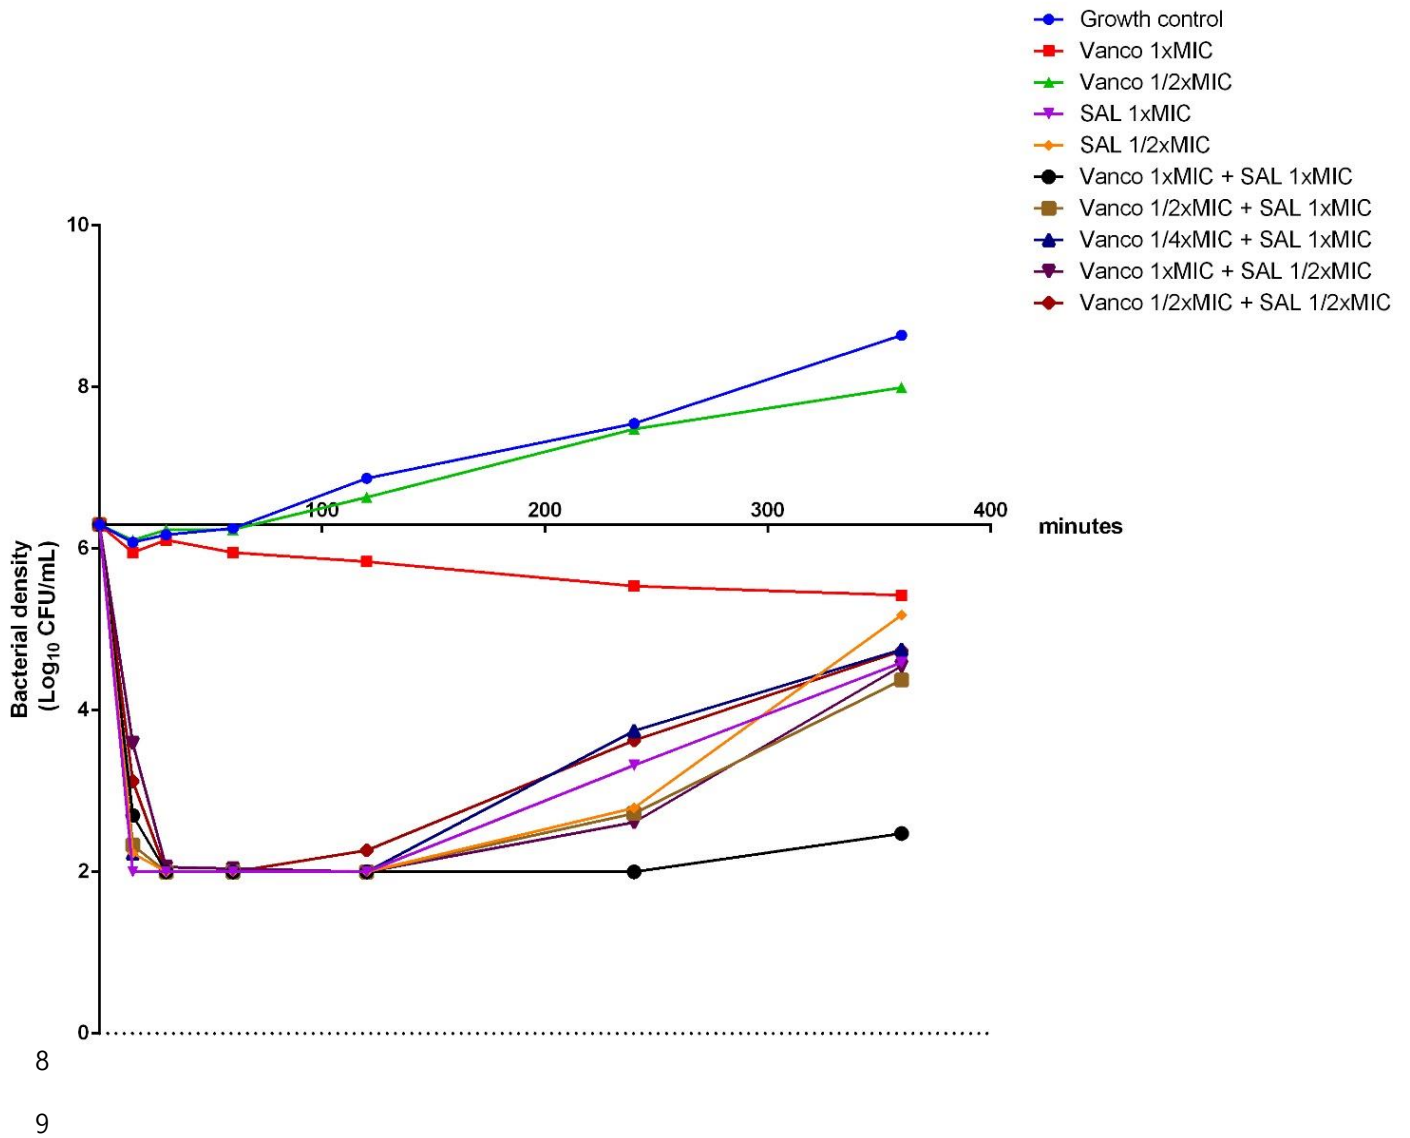

(b) MSSA ATCC 29213

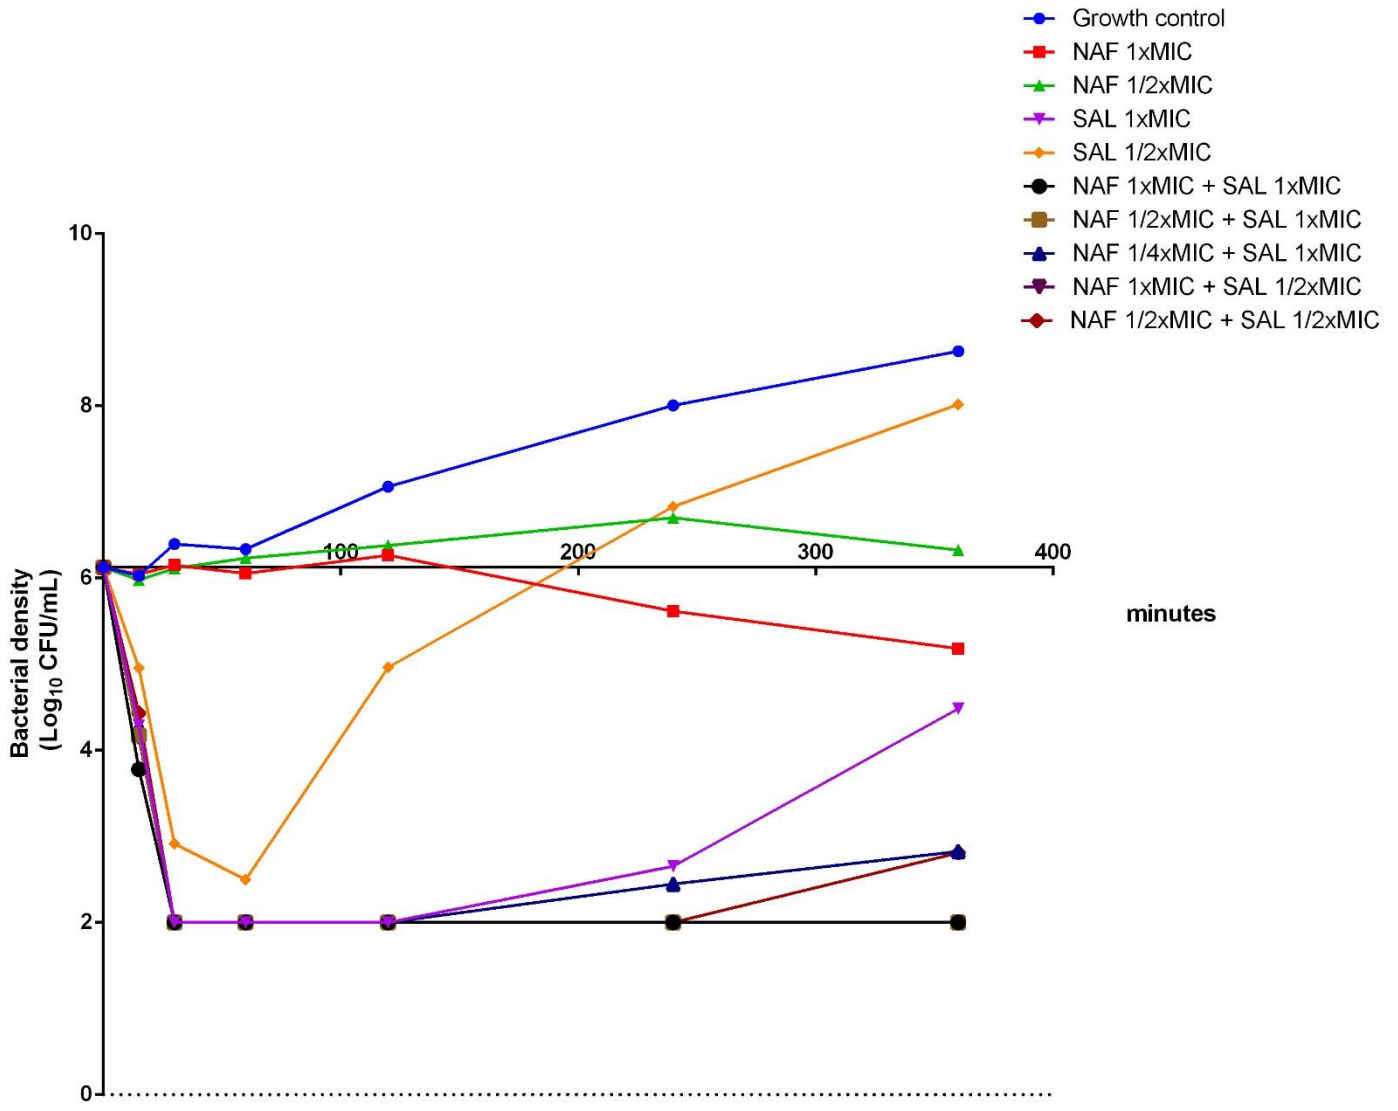

Supplement: zac010187501s1.pdf [file zac010187501s1.pdf]
